# Supplementary material for: Insulative wood materials templated by wet foams
Source: Royal Society of Chemistry journal article supplement (doi:10.1039/d2ma00852a), 2022-12-15
Supplement: d2ma00852a4.pdf [file d2ma00852a4.pdf]

## Supporting Information

### Insulative wood materials templated by wet foams

Elisa S. Ferreira, Elizabeth Dobrzanski, Praphulla Tiwary, Prashant Agrawal, Richard Chen,  
Emily D. Cranston

#### Size distribution of milled wood

Size distribution was determined from optical microscopy images (Fig. S1a) using Fiji processing package for ImageJ2 freeware. Milled wood particles exhibited a broad size distribution with aspect ratio values from 2 to 12 with aspect ratios 2, 3 and 4 being the most frequent (Fig. S1b).

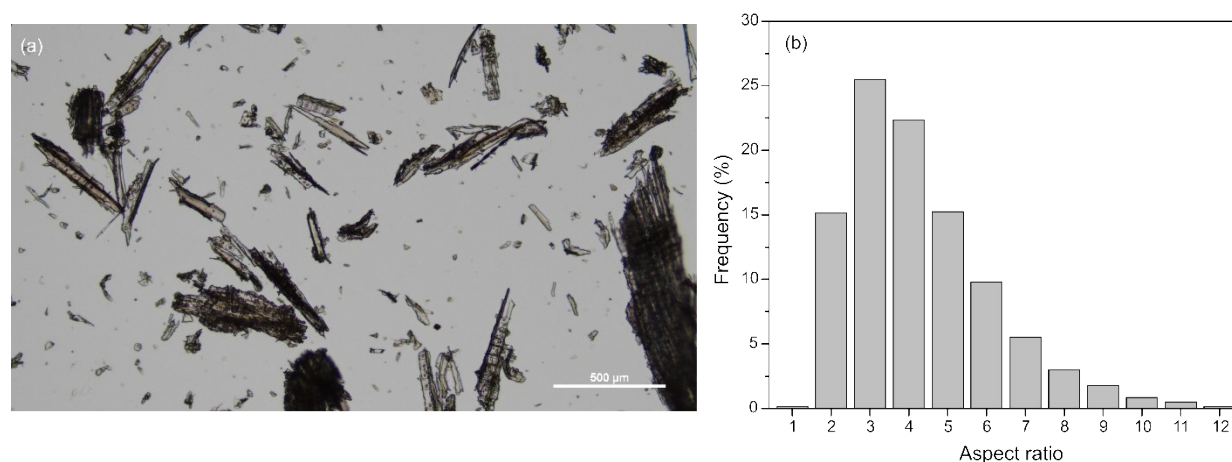

Fig. S1. (a) Representative image from optical microscopy used to determine the aspect ratio of milled wood particles; (b) aspect ratio distribution of milled wood.

#### Stability of wet foams

Bubble size and liquid drainage from the wet foams were observed over time (Fig. S2). Immediately after preparation, bubbles could not be identified by eye, forming a white wet foam, and a bubble size increase was observed after one and three days without significant collapse for

all samples (initial volume remained constant). Liquid drainage was noticed a few minutes after preparation and the drained volume (around 8%) was constant after one day, regardless of the foam composition. Drainage was faster for foams with higher wood/PVA ratios, indicating that a high PVA content could de-accelerate liquid flow.

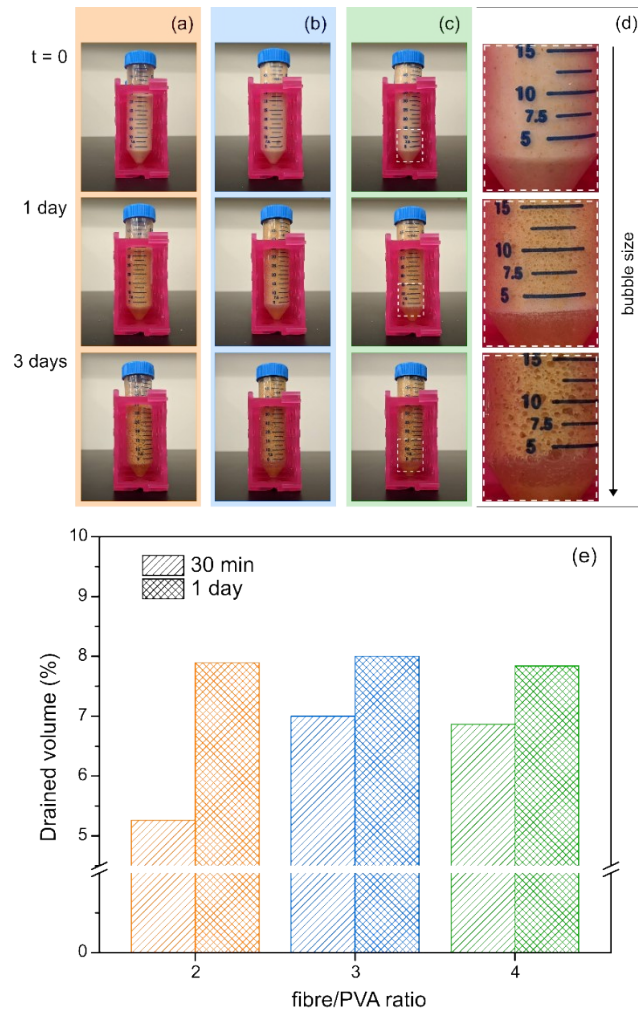

Fig. S2. Wet wood foams with wood/PVA ratios of: (a) 2; (b) 3; and (c) 4 immediately after preparation, after one day, and three days; (d) Detail of foam structure from frames in (c) showing bubble size increase over time without foam collapse; (e) drained volume percentage with respect to the initial wet foam volume after 30 min and one day. The composition of the wet foams is described in Table 1.
